# Supplementary material for: Histone H2A‐H2B binding by Pol α in the eukaryotic replisome contributes to the maintenance of repressive chromatin
Source: PubMed Central journal article supplement (PMC6166128; doi:10.15252/embj.201899021), 2018-08-13
Supplement: EMBJ-37-e99021-s002.pdf [file EMBJ-37-e99021-s002.pdf]

## Expanded View Figures

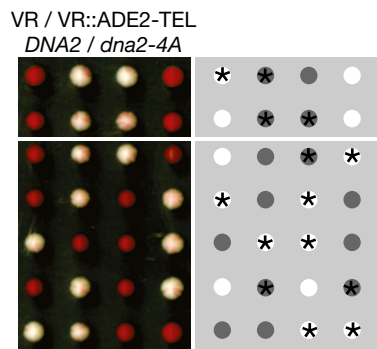

\* dna2-4A  
● ADE2

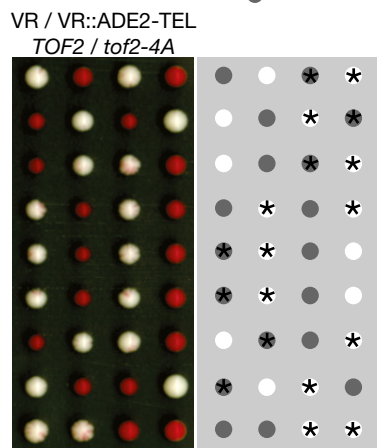

\* tof2-4A  
● ADE2

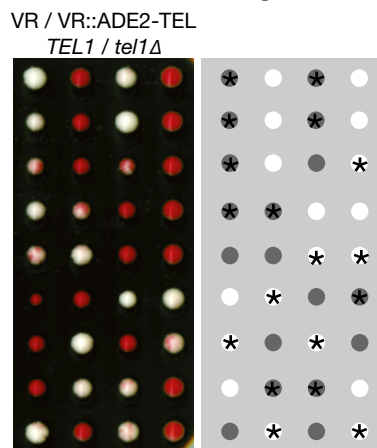

\* tel1Δ  
● ADE2

**Figure EV1. Sub-telomeric silencing is not affected by CIP-box mutations in the Ctf4 partners Dna2 or Tof2, or by deletion of the TEL1 gene.**

The indicated diploids were processed as described above for Fig 2.

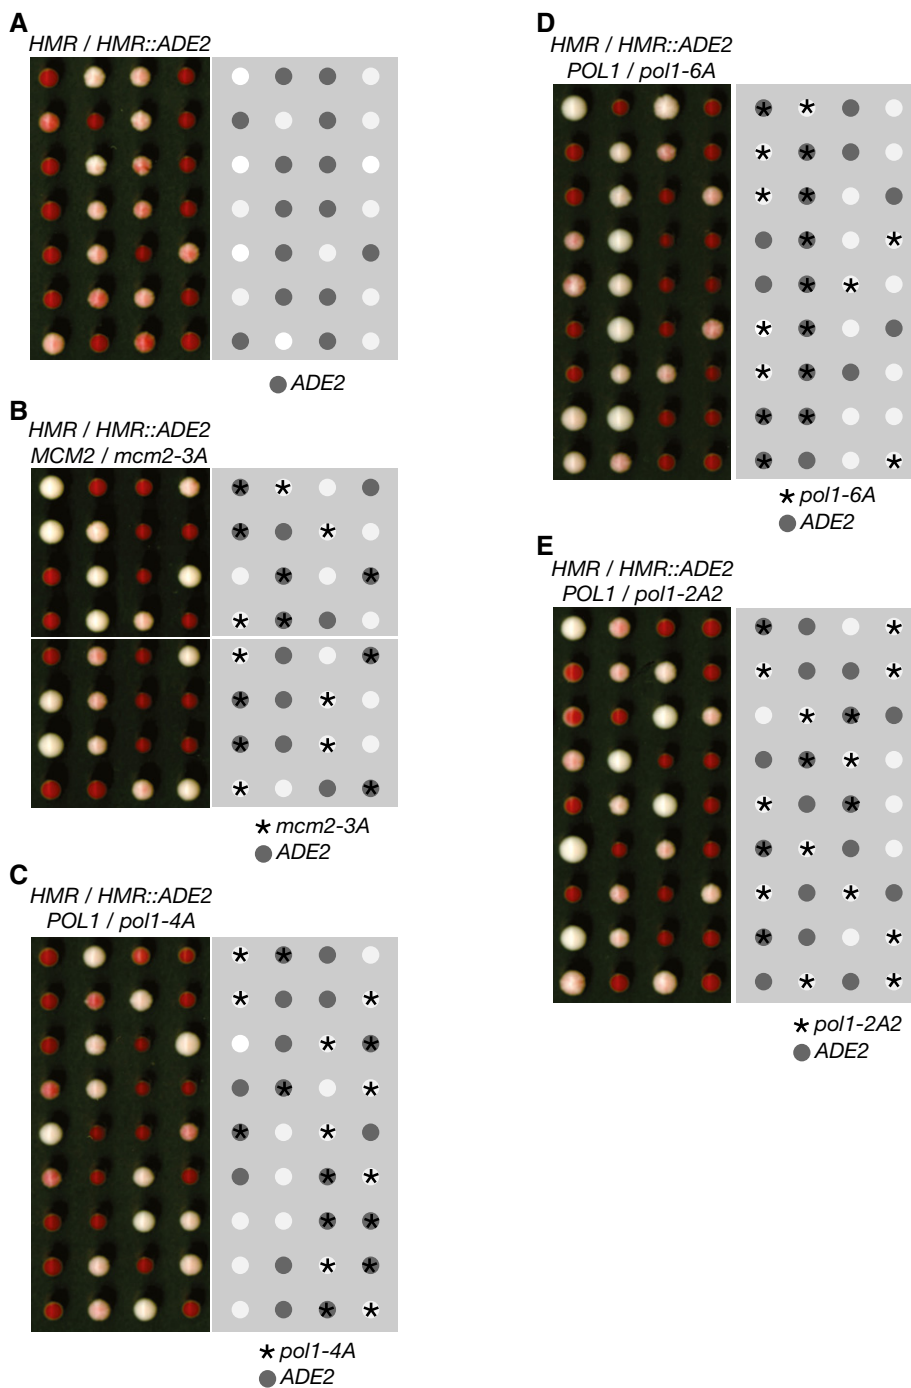

**Figure EV2. Replisome-tethered histone-binding activity of Mcm2 and Pol alpha is required for gene silencing at the HMR mating-type locus.**

A–E Tetrad analysis of meiotic progeny of the indicated diploids (heterozygous for insertion of the *ADE2* marker gene at the HMR locus on chromosome 3), processed as described in Materials and Methods. The promoter of the *ADE2* marker was positioned proximal to the *HMR-E* silencer element (denoted *HMR::ADE2*), and this corresponded to weaker silencing of *ADE2* compared to the *HMR::2EDA* strains in Fig 2D–F. We examined a total of 16 *mcm2-3A HMR::ADE2* colonies, 16 *pol1-4A HMR::ADE2* colonies, 15 *pol1-2A2 HMR::ADE2* colonies and 16 *pol1-6A HMR::ADE2* colonies.

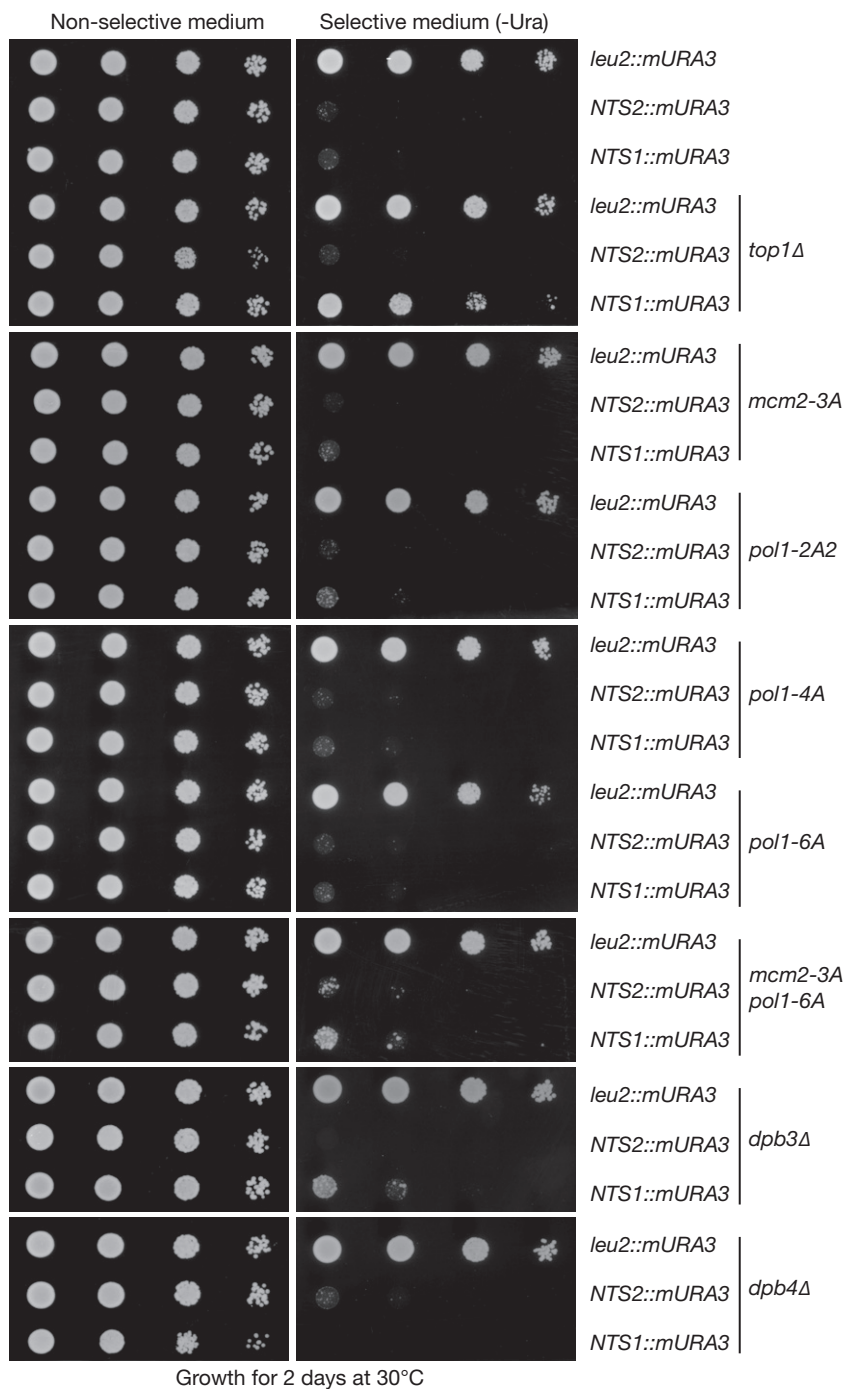

**Figure EV3. Histone-binding activities of replisome proteins are largely dispensable for gene silencing within the rDNA repeats.**

Serial dilutions of the indicated strains, in which the “modified *URA3* marker” (*mURA3*) was inserted at the *leu2* locus or else within the “Non-transcribed spacers” of an rDNA repeat (*NTS1* and *NTS2*), were grown on non-selective or selective medium, as described in Materials and Methods. In control cells, *mURA3* can be expressed from the *leu2* locus but is repressed when present at the *NTS1* or *NTS2* element of an rDNA repeat. Repression at *NTS1* was lost in *top1 $\Delta$*  cells, as seen previously (Huang *et al*, 2006), but an equivalent defect was not observed in *mcm2-3A*, *pol1-2A2*, *pol1-4A*, *pol1-6A*, *mcm2-3A pol1-6A*, *dpb3 $\Delta$*  or *dpb4 $\Delta$* .

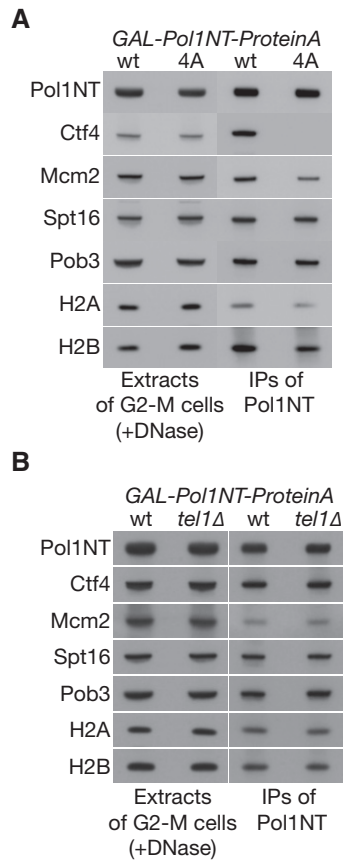

**Figure EV4. Neither Ctf4 nor Tel1 is required for the histone-binding activity of Pol1NT.**

A Mutation of the CIP-box of Pol1 displaces Ctf4 without affecting the interaction with histones released from chromatin.

B Although Tel1 is a novel partner of Pol1NT, deletion of the *TEL1* gene does not affect histone-binding by Pol1NT.

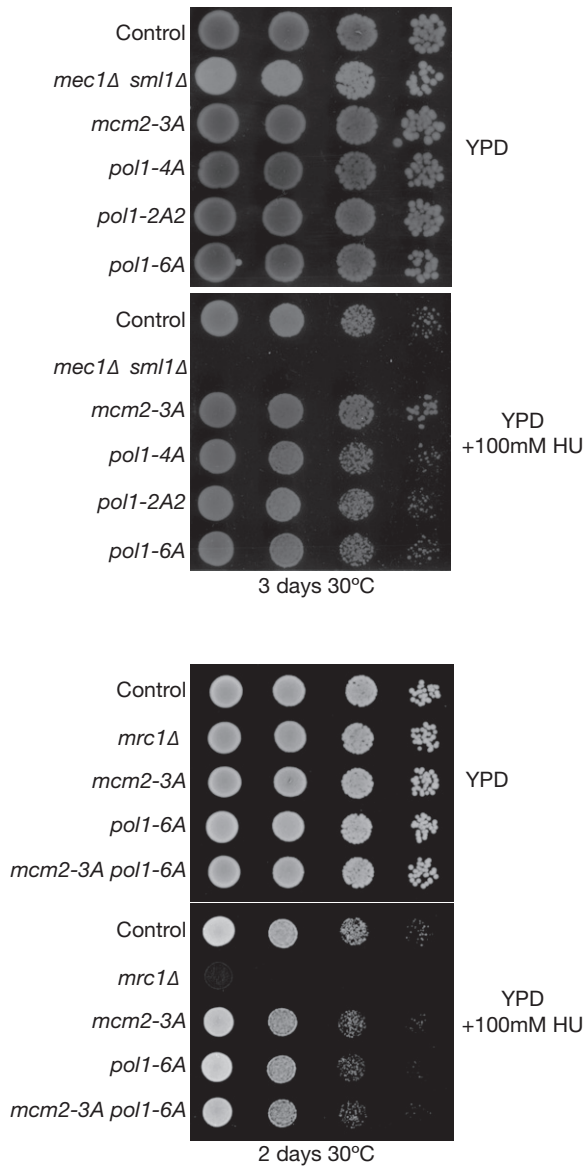

**Figure EV5. Mutations in the histone-binding motifs of Mcm2 or Pol1 do not cause sensitivity to hydroxyurea treatment.**

Serial dilutions of cells were grown on the indicated media for 2–3 days at 30°C before imaging.
